# Supplementary material
Source: PubMed Central journal article supplement (PMC3919467)
Supplement: NIHMS537985-supplement-1_si_001.pdf [file NIHMS537985-supplement-1_si_001.pdf]

*In Vitro* Selection of Shape-Changing DNA  
Nanostructures Capable of Binding-Induced Cargo  
Release

*Seung Soo Oh*<sup>†</sup>, *Kory Plakos*<sup>†,‡</sup>, *Yi Xiao*<sup>†,‡</sup>, *Michael Eisenstein*<sup>†,‡</sup>, *Hyongsok Tom Soh*<sup>†,‡\*</sup>

<sup>†</sup>Materials Department, <sup>‡</sup>Department of Mechanical Engineering, University of California, Santa  
Barbara, CA 93106

\*Corresponding author: [tsoh@engr.ucsb.edu](mailto:tsoh@engr.ucsb.edu)

## SUPPORTING INFORMATION

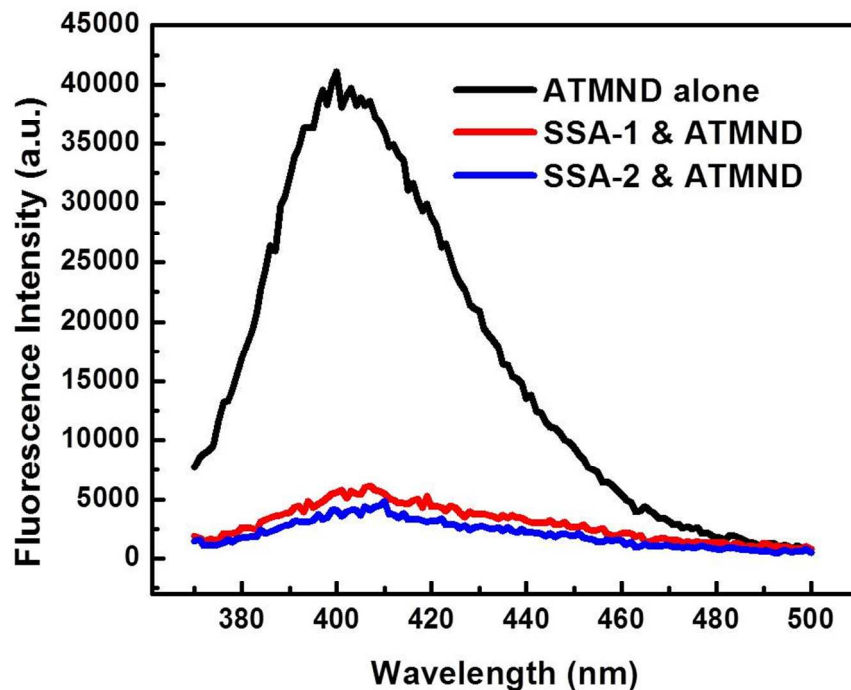

**Figure S1.** Loading into the abasic site of SSA/cargo strand duplex structures efficiently quenches ATMND fluorescence. Duplex-loaded ATMND yields 7- and 9-fold lower fluorescence intensities with SSA-1 (red) and SSA-2 (blue), respectively, compared to free ATMND in solution (black).

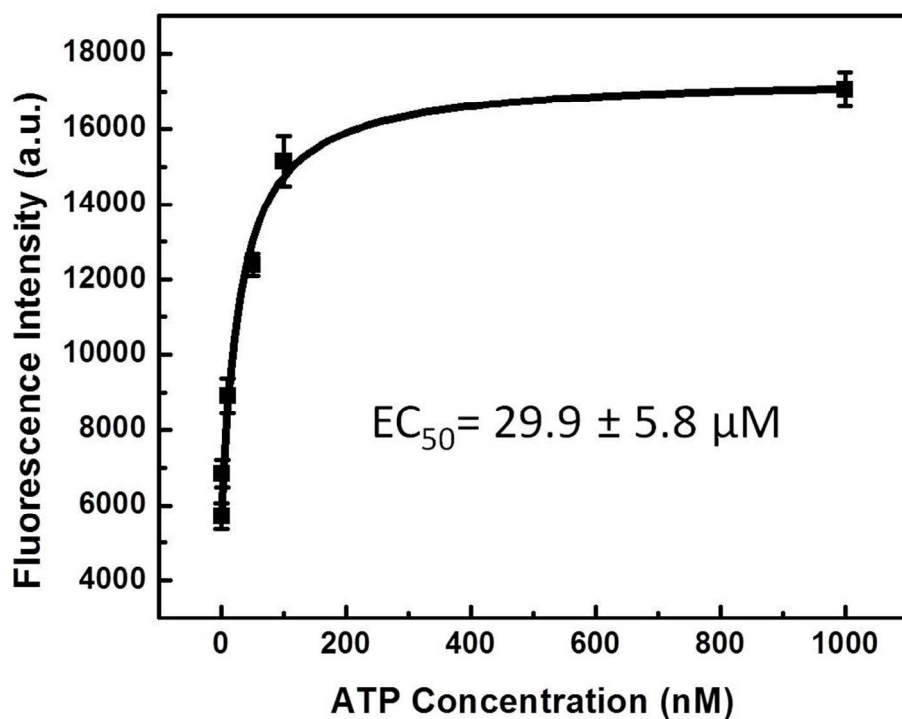

**Figure S2.** Calibration curve for SSA-1 structure-switching derived from fluorescence intensities detected at increasing ATP concentrations yields an  $EC_{50}$  value of  $29.9 \pm 5.8 \mu M$  at  $5 \mu M$  of SSA-1/cargo strand (1:1.5 in ratio) concentration.

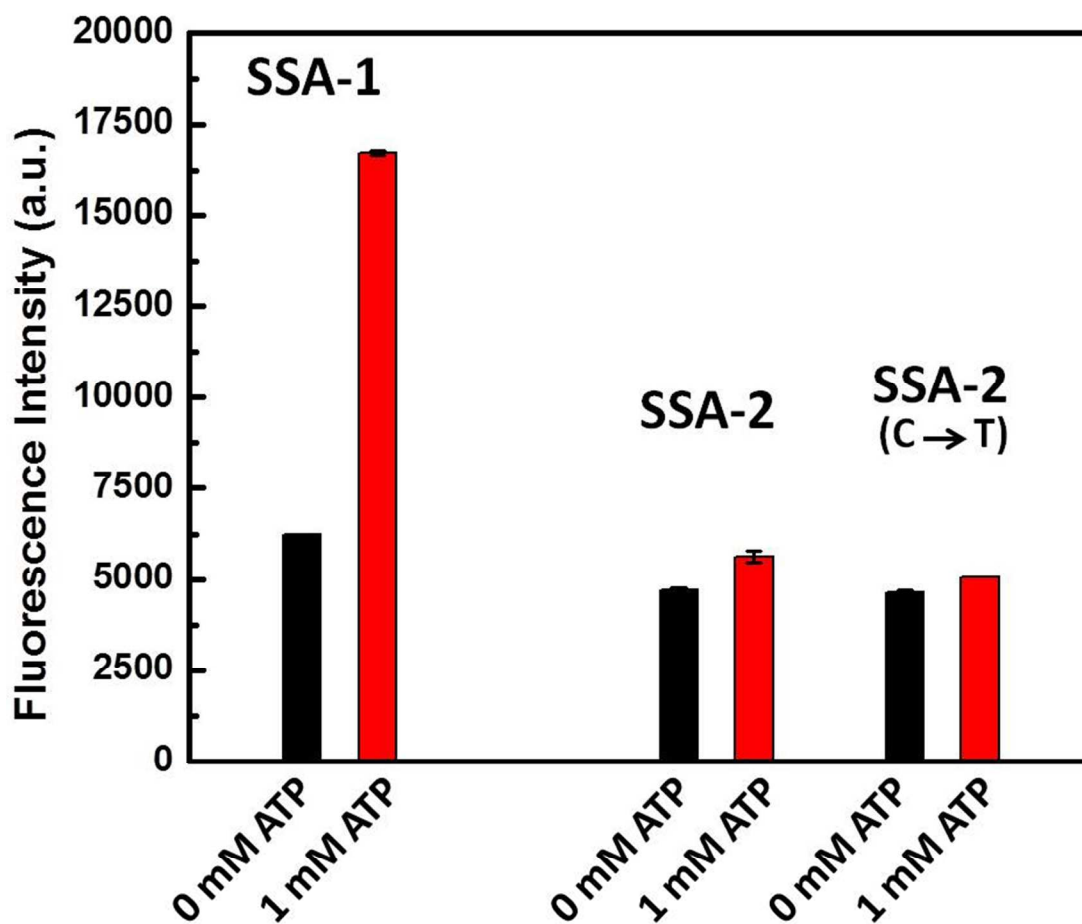

**Figure S3.** Comparison of ATP-induced cargo release by SSAs in solution. When challenged with 1 mM ATP, SSA-1 generates a strong fluorescent signal (170% increase relative to no ATP), indicating efficient cargo release as a result of binding-induced structure-switching. By comparison, SSA-2 and SSA-2 where the T-to-C mutation is reverted achieve only limited ATMND release in solution (15% and 9% increase, respectively). These results indicate that this mutation is not responsible for the difference in cargo release, which may instead be attributable to SSA-2's dependence on the presence of a solid support.

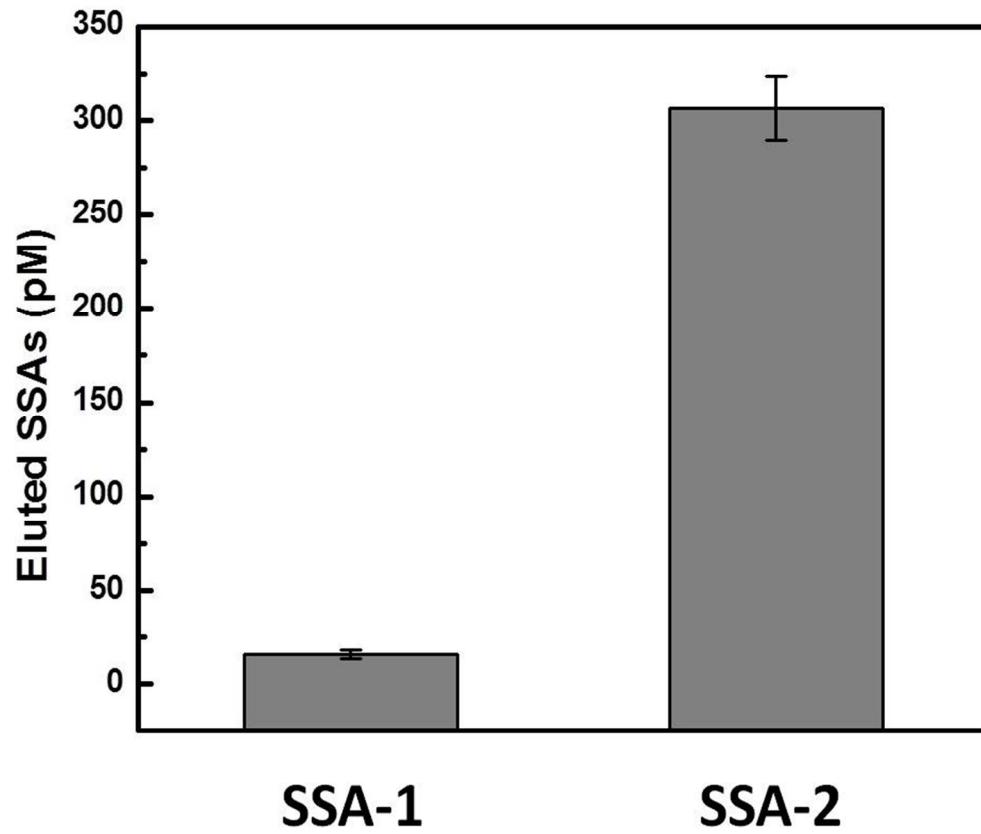

**Figure S4.** Comparison of SA-binding between the two SSAs. We incubated both SSAs at 100 nM concentration with SA-coated beads, and heat eluted bound DNAs after thorough washing. Eluted DNAs were quantified *via* RT-PCR, and we observed that SSA-2 binding to SA beads was ~20-fold greater than for SSA-1.

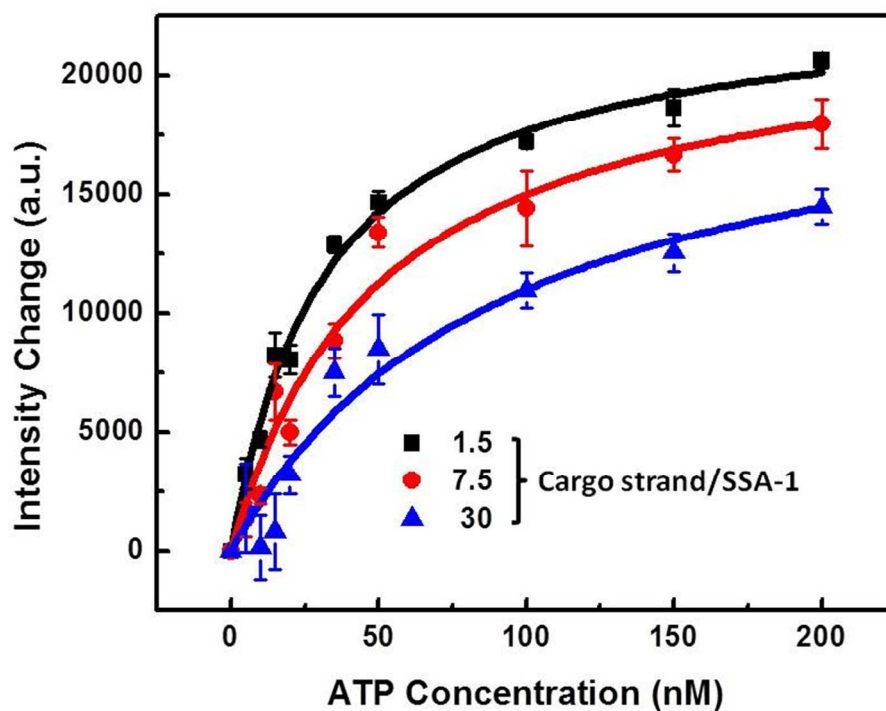

**Figure S5.**  $EC_{50}$  of SSA-1 in response to ATP is dependent on cargo strand concentration. As the cargo strand:SSA-1 ratio increases,  $EC_{50}$  also increases; For cargo strand:SSA-1 ratios of 1.5 (black), 7.5 (red) and 30 (blue) with a 30 nM concentration of SSA-1, we observed  $EC_{50}$  values of  $31.8 \pm 4.8 \mu\text{M}$ ,  $50.2 \pm 10.8 \mu\text{M}$  and  $92.0 \pm 31.7 \mu\text{M}$ , respectively.

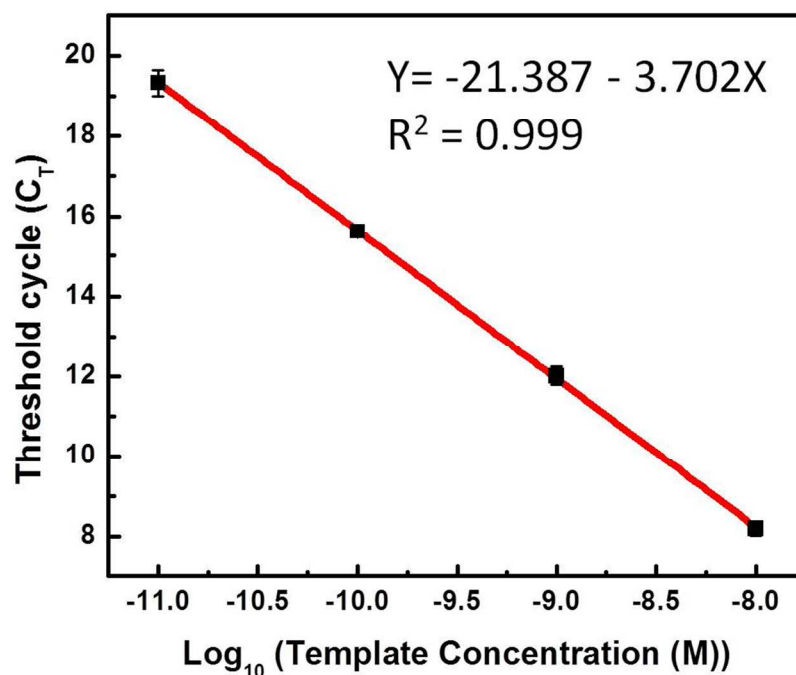

**Figure S6.** Threshold cycle ( $C_T$ ) values of SSAs released from magnetic beads after binding to ATP. The template concentration and  $C_T$  were fitted with linear regression. We calculated a PCR efficiency of 86.3%.

**Table S1.** Sequences of DNA molecules used in these experiments

| Name             | Sequence                                                                                                     | Description                                                  |
|------------------|--------------------------------------------------------------------------------------------------------------|--------------------------------------------------------------|
| ssDNA library    | 5'-AGCAGCACAGAGGTCAGATG-N <sub>17</sub> -TTTTGTGGGTAGGGCGGGTTGGTTTT-N <sub>17</sub> -CCTATGCGTGCTACCGTGAA-3' | DNA sequence with two randomized 17-base recognition domains |
| FP               | 5'-AGCAGCACAGAGGTCAGATG-3'                                                                                   | Forward primer                                               |
| RP               | 5'-TTCACGGTAGCACGCATAGG-3'                                                                                   | Reverse primer                                               |
| RP-biotin        | 5'-biotin-TTCACGGTAGCACGCATAGG-3'                                                                            | Biotinylated reverse primer for ssDNA generation             |
| FP-complementary | 5'-CATCTGACCTCTGTGCTGCT-3'                                                                                   | Blocking strand of forward primer binding site.              |
| M12-T12-biotin   | 5'-biotin-TTTTTTTTTTTTAACCCGCCCTAC-3'                                                                        | Biotinylated cargo strand with T <sub>12</sub> extension     |
| M12              | 5'-AACCCXCCCTAC-3'                                                                                           | Cargo strand with an abasic site                             |



**Table S2.** Selection conditions during ten rounds of SSA selection.

|     | R1   | R2   | R3        | R4        | R5        | R6        | R7        | R8         | R9         | R10        |
|-----|------|------|-----------|-----------|-----------|-----------|-----------|------------|------------|------------|
| SA  |      |      | 1 $\mu$ M  | 1 $\mu$ M  | 1 $\mu$ M  |
| BSA |      |      | 1 $\mu$ M  | 1 $\mu$ M  | 1 $\mu$ M  |
| GTP |      |      |           |           |           |           | 1 mM      | 1 mM       | 1 mM       | 1 mM       |
| ATP | 1 mM | 1 mM | 1 mM      | 0.8 mM    | 0.4 mM    | 0.2 mM    | 0.1 mM    | 70 $\mu$ M | 20 $\mu$ M | 20 $\mu$ M |

**Table S3.** 50 cloned sequences from the SSA library synthesized from machine-mixed nucleotides.

|    | 1             | 10       | 20    | 30      | 40    | 50   | 60   | 70  | 80 | 90 | 100        |      |      |      |      |     |     |     |     |     |
|----|---------------|----------|-------|---------|-------|------|------|-----|----|----|------------|------|------|------|------|-----|-----|-----|-----|-----|
| 1  | AGCAGCACAGAGG | TCAGAGTA | AAA   | CCAGGAG | AGA   | GGGG | AGGG | GGG | GG | CA | GACAAAGGAG | CA   | CCCA | CCG  | CG   | CA  | CCG | GAA |     |     |
| 2  | AGCAGCACAGAGG | TCAGAGTA | AACA  | AAGA    | AGG   | GGGG | AGGG | GGG | GG | CA | AGAA       | AAAA | CA   | CCCA | CCG  | CG  | CA  | CCG | GAA |     |
| 3  | AGCAGCACAGAGG | TCAGAGTA | AAAA  | AG      | GGAGG | GGGG | AGGG | GGG | GG | CA | AAAA       | AG   | AAAA | CA   | CCCA | CCG | CG  | CA  | CCG | GAA |
| 4  | AGCAGCACAGAGG | TCAGAGTA | CC    | AGCA    | GG    | GGGG | AGGG | GGG | GG | CA | AGAG       | AGAG | AGAG | CA   | CCCA | CCG | CG  | CA  | CCG | GAA |
| 5  | AGCAGCACAGAGG | TCAGAGTA | CC    | AG      | GGGA  | GGGG | AGGG | GGG | GG | CA | AGAG       | AGAG | AGAG | CA   | CCCA | CCG | CG  | CA  | CCG | GAA |
| 6  | AGCAGCACAGAGG | TCAGAGTA | GGG   | GAAGAC  | G     | GGGG | AGGG | GGG | GG | CA | AAAA       | CC   | GG   | CA   | CCCA | CCG | CG  | CA  | CCG | GAA |
| 7  | AGCAGCACAGAGG | TCAGAGTA | AGGGG | AGAA    | GAAA  | GGGG | AGGG | GGG | GG | CA | AA         | CC   | GG   | CA   | CCCA | CCG | CG  | CA  | CCG | GAA |
| 8  | AGCAGCACAGAGG | TCAGAGTA | AG    | CA      | AG    | GGGG | AGGG | GGG | GG | CA | AG         | AG   | AG   | CA   | CCCA | CCG | CG  | CA  | CCG | GAA |
| 9  | AGCAGCACAGAGG | TCAGAGTA | AG    | CA      | AG    | GGGG | AGGG | GGG | GG | CA | AG         | AG   | AG   | CA   | CCCA | CCG | CG  | CA  | CCG | GAA |
| 10 | AGCAGCACAGAGG | TCAGAGTA | AG    | CA      | AG    | GGGG | AGGG | GGG | GG | CA | AG         | AG   | AG   | CA   | CCCA | CCG | CG  | CA  | CCG | GAA |
| 11 | AGCAGCACAGAGG | TCAGAGTA | AG    | CA      | AG    | GGGG | AGGG | GGG | GG | CA | AG         | AG   | AG   | CA   | CCCA | CCG | CG  | CA  | CCG | GAA |
| 12 | AGCAGCACAGAGG | TCAGAGTA | AG    | CA      | AG    | GGGG | AGGG | GGG | GG | CA | AG         | AG   | AG   | CA   | CCCA | CCG | CG  | CA  | CCG | GAA |
| 13 | AGCAGCACAGAGG | TCAGAGTA | AG    | CA      | AG    | GGGG | AGGG | GGG | GG | CA | AG         | AG   | AG   | CA   | CCCA | CCG | CG  | CA  | CCG | GAA |
| 14 | AGCAGCACAGAGG | TCAGAGTA | AG    | CA      | AG    | GGGG | AGGG | GGG | GG | CA | AG         | AG   | AG   | CA   | CCCA | CCG | CG  | CA  | CCG | GAA |
| 15 | AGCAGCACAGAGG | TCAGAGTA | AG    | CA      | AG    | GGGG | AGGG | GGG | GG | CA | AG         | AG   | AG   | CA   | CCCA | CCG | CG  | CA  | CCG | GAA |
| 16 | AGCAGCACAGAGG | TCAGAGTA | AG    | CA      | AG    | GGGG | AGGG | GGG | GG | CA | AG         | AG   | AG   | CA   | CCCA | CCG | CG  | CA  | CCG | GAA |
| 17 | AGCAGCACAGAGG | TCAGAGTA | AG    | CA      | AG    | GGGG | AGGG | GGG | GG | CA | AG         | AG   | AG   | CA   | CCCA | CCG | CG  | CA  | CCG | GAA |
| 18 | AGCAGCACAGAGG | TCAGAGTA | AG    | CA      | AG    | GGGG | AGGG | GGG | GG | CA | AG         | AG   | AG   | CA   | CCCA | CCG | CG  | CA  | CCG | GAA |
| 19 | AGCAGCACAGAGG | TCAGAGTA | AG    | CA      | AG    | GGGG | AGGG | GGG | GG | CA | AG         | AG   | AG   | CA   | CCCA | CCG | CG  | CA  | CCG | GAA |
| 20 | AGCAGCACAGAGG | TCAGAGTA | AG    | CA      | AG    | GGGG | AGGG | GGG | GG | CA | AG         | AG   | AG   | CA   | CCCA | CCG | CG  | CA  | CCG | GAA |
| 21 | AGCAGCACAGAGG | TCAGAGTA | AG    | CA      | AG    | GGGG | AGGG | GGG | GG | CA | AG         | AG   | AG   | CA   | CCCA | CCG | CG  | CA  | CCG | GAA |
| 22 | AGCAGCACAGAGG | TCAGAGTA | AG    | CA      | AG    | GGGG | AGGG | GGG | GG | CA | AG         | AG   | AG   | CA   | CCCA | CCG | CG  | CA  | CCG | GAA |
| 23 | AGCAGCACAGAGG | TCAGAGTA | AG    | CA      | AG    | GGGG | AGGG | GGG | GG | CA | AG         | AG   | AG   | CA   | CCCA | CCG | CG  | CA  | CCG | GAA |
| 24 | AGCAGCACAGAGG | TCAGAGTA | AG    | CA      | AG    | GGGG | AGGG | GGG | GG | CA | AG         | AG   | AG   | CA   | CCCA | CCG | CG  | CA  | CCG | GAA |
| 25 | AGCAGCACAGAGG | TCAGAGTA | AG    | CA      | AG    | GGGG | AGGG | GGG | GG | CA | AG         | AG   | AG   | CA   | CCCA | CCG | CG  | CA  | CCG | GAA |
| 26 | AGCAGCACAGAGG | TCAGAGTA | AG    | CA      | AG    | GGGG | AGGG | GGG | GG | CA | AG         | AG   | AG   | CA   | CCCA | CCG | CG  | CA  | CCG | GAA |
| 27 | AGCAGCACAGAGG | TCAGAGTA | AG    | CA      | AG    | GGGG | AGGG | GGG | GG | CA | AG         | AG   | AG   | CA   | CCCA | CCG | CG  | CA  | CCG | GAA |
| 28 | AGCAGCACAGAGG | TCAGAGTA | AG    | CA      | AG    | GGGG | AGGG | GGG | GG | CA | AG         | AG   | AG   | CA   | CCCA | CCG | CG  | CA  | CCG | GAA |
| 29 | AGCAGCACAGAGG | TCAGAGTA | AG    | CA      | AG    | GGGG | AGGG | GGG | GG | CA | AG         | AG   | AG   | CA   | CCCA | CCG | CG  | CA  | CCG | GAA |
| 30 | AGCAGCACAGAGG | TCAGAGTA | AG    | CA      | AG    | GGGG | AGGG | GGG | GG | CA | AG         | AG   | AG   | CA   | CCCA | CCG | CG  | CA  | CCG | GAA |
| 31 | AGCAGCACAGAGG | TCAGAGTA | AG    | CA      | AG    | GGGG | AGGG | GGG | GG | CA | AG         | AG   | AG   | CA   | CCCA | CCG | CG  | CA  | CCG | GAA |
| 32 | AGCAGCACAGAGG | TCAGAGTA | AG    | CA      | AG    | GGGG | AGGG | GGG | GG | CA | AG         | AG   | AG   | CA   | CCCA | CCG | CG  | CA  | CCG | GAA |
| 33 | AGCAGCACAGAGG | TCAGAGTA | AG    | CA      | AG    | GGGG | AGGG | GGG | GG | CA | AG         | AG   | AG   | CA   | CCCA | CCG | CG  | CA  | CCG | GAA |
| 34 | AGCAGCACAGAGG | TCAGAGTA | AG    | CA      | AG    | GGGG | AGGG | GGG | GG | CA | AG         | AG   | AG   | CA   | CCCA | CCG | CG  | CA  | CCG | GAA |
| 35 | AGCAGCACAGAGG | TCAGAGTA | AG    | CA      | AG    | GGGG | AGGG | GGG | GG | CA | AG         | AG   | AG   | CA   | CCCA | CCG | CG  | CA  | CCG | GAA |
| 36 | AGCAGCACAGAGG | TCAGAGTA | AG    | CA      | AG    | GGGG | AGGG | GGG | GG | CA | AG         | AG   | AG   | CA   | CCCA | CCG | CG  | CA  | CCG | GAA |
| 37 | AGCAGCACAGAGG | TCAGAGTA | AG    | CA      | AG    | GGGG | AGGG | GGG | GG | CA | AG         | AG   | AG   | CA   | CCCA | CCG | CG  | CA  | CCG | GAA |
| 38 | AGCAGCACAGAGG | TCAGAGTA | AG    | CA      | AG    | GGGG | AGGG | GGG | GG | CA | AG         | AG   | AG   | CA   | CCCA | CCG | CG  | CA  | CCG | GAA |
| 39 | AGCAGCACAGAGG | TCAGAGTA | AG    | CA      | AG    | GGGG | AGGG | GGG | GG | CA | AG         | AG   | AG   | CA   | CCCA | CCG | CG  | CA  | CCG | GAA |
| 40 | AGCAGCACAGAGG | TCAGAGTA | AG    | CA      | AG    | GGGG | AGGG | GGG | GG | CA | AG         | AG   | AG   | CA   | CCCA | CCG | CG  | CA  | CCG | GAA |
| 41 | AGCAGCACAGAGG | TCAGAGTA | AG    | CA      | AG    | GGGG | AGGG | GGG | GG | CA | AG         | AG   | AG   | CA   | CCCA | CCG | CG  | CA  | CCG | GAA |
| 42 | AGCAGCACAGAGG | TCAGAGTA | AG    | CA      | AG    | GGGG | AGGG | GGG | GG | CA | AG         | AG   | AG   | CA   | CCCA | CCG | CG  | CA  | CCG | GAA |
| 43 | AGCAGCACAGAGG | TCAGAGTA | AG    | CA      | AG    | GGGG | AGGG | GGG | GG | CA | AG         | AG   | AG   | CA   | CCCA | CCG | CG  | CA  | CCG | GAA |
| 44 | AGCAGCACAGAGG | TCAGAGTA | AG    | CA      | AG    | GGGG | AGGG | GGG | GG | CA | AG         | AG   | AG   | CA   | CCCA | CCG | CG  | CA  | CCG | GAA |
| 45 | AGCAGCACAGAGG | TCAGAGTA | AG    | CA      | AG    | GGGG | AGGG | GGG | GG | CA | AG         | AG   | AG   | CA   | CCCA | CCG | CG  | CA  | CCG | GAA |
| 46 | AGCAGCACAGAGG | TCAGAGTA | AG    | CA      | AG    | GGGG | AGGG | GGG | GG | CA | AG         | AG   | AG   | CA   | CCCA | CCG | CG  | CA  | CCG | GAA |
| 47 | AGCAGCACAGAGG | TCAGAGTA | AG    | CA      | AG    | GGGG | AGGG | GGG | GG | CA | AG         | AG   | AG   | CA   | CCCA | CCG | CG  | CA  | CCG | GAA |
| 48 | AGCAGCACAGAGG | TCAGAGTA | AG    | CA      | AG    | GGGG | AGGG | GGG | GG | CA | AG         | AG   | AG   | CA   | CCCA | CCG | CG  | CA  | CCG | GAA |
| 49 | AGCAGCACAGAGG | TCAGAGTA | AG    | CA      | AG    | GGGG | AGGG | GGG | GG | CA | AG         | AG   | AG   | CA   | CCCA | CCG | CG  | CA  | CCG | GAA |
| 50 | AGCAGCACAGAGG | TCAGAGTA | AG    | CA      | AG    | GGGG | AGGG | GGG | GG | CA | AG         | AG   | AG   | CA   | CCCA | CCG | CG  | CA  | CCG | GAA |
